# Supplementary material
Source: MDPI journal article supplement (https://www.mdpi.com/2306-5338/10/4/82)
Supplement: s1 [file s1 › Supplementary Material B.xlsx]

## Sheet: Nitrate
Dangishta																										Robit Bata
Well ID	2017-01-17	2017-02-18	2017-03-22	2017-04-23	2017-05-25	2017-06-26	2017-07-28	2017-08-29	2017-09-30	2017-10-01	2017-11-01	2017-12-03	2018-01-04	2018-02-05	2018-03-09	2018-04-10	2018-05-12	2018-06-13	2018-07-15	2018-08-16	2018-09-17	2018-10-19	2018-11-20	2018-12-22		Well ID	2017-01-17	2017-02-18	2017-03-22	2017-04-23	2017-05-25	2017-06-26	2017-07-28	2017-08-29	2017-09-30	2017-10-30	2017-11-01	2017-12-03	2018-01-04	2018-02-05	2018-03-09	2018-04-10	2018-05-12	2018-06-13	2018-07-15	2018-08-16	2018-09-17	2018-10-19	2018-11-20
W9	5.6	5.22	4.18	3.14	3.48	4.6	5.16	5.14	5.22	5.12	8.1	5.22	2.98	3.02	3.06	2.9	2.82	6.02	4.34	4.04	5.34	7.04	5.38	0.261		1.1	2.83	5.46	4.65	4.84	3.52	4.28	5.36	6.04	5.22	5.85	4.68	3	1.78	3.38	4.98	1.218	2.4	4.46	5.4	6.4	3.66	2.84	4.6
W4	6.3	6	4.17	2.34	2.96	4.4	6.84	3.44	2.16	4.32	3.32	4.82	3.94	2.05	0.62	3.68	0.131	10.6	5.22	3.26	4.68	2.18	3.96	1.96		1.2	1.923	2.72	7.592	8.9	5.42	4.66	5.565	4.72	3.44	7.12	10.6	4.86	4.32	6.36	8.4	2.9	3.25	3.6	3.64	3.34	4.12	4.54	5.66
W19	0.01	0.01	0	0.212	0.077	3.4	9.34	0.67	14.22	4.36	0.111	0.323	0.07	0.19	0.302	2.26	1.36	0.945	3.48	3.64	3.58	4.42	4.14	4.8		1.6	4.38	2.298	2.601	3.42	1.01	0.344	1.735	4.26	2.72	2.64	3.92	2	1.58	2.08	2.58	5.26	3.5	1.78	0.741	3.28	3.7	2.86	4.14
W5	3.24	3.14	3.6	4.06	3.5	0.365	9.06	0.787	1.4	7.22	6.74	4.76	0.842	2.04	3.24	0.178	0.241	3.1	10.9	5.22	12.2	5.36	4.36	5.6		2.1	1.88	4.3	0.758	0.75	0.811	4.34	4.48	4.08	2.4	3.76	3.92	4.32	4.66	5.26	4.26	4.44	4.62	3.88	3.18	3.88	5.32	4.85	4.74
W17	0.98	0.09	0.08	0.069	1.8	2.18	3.02	6.58	4.32	3.06	5.4	0.57	1.12	9.31	7.5	0.233	0.081	0.863	0.961	2.36	5.56	1.4	0.705	2.68		2.3	3.67	4.78	5.644	5.14	5.18	6.44	4.48	1.635	3.52	4.6	8.52	6.46	3.82	4.3	4.86	4.1	4.7	5.6	3.52	5.24	9.8	5.8	5.92
W43	6.16	5.16	6.22	3.08	4.56	7.5	17.12	17	5.9	6.68	7.34	3.84	7.26	6.47	5.68	6.46	4.6	4.06	4.8	5.32	6.58	7.36	6.32	4.7		2.4	4.56	2.39	4.965	5.62	2.94	5.6	1.311	7.34	5.88	4.26	10.1	5.26	4.86	10.9	4.2	4.7	5.16	5.62	3.08	3.3	5.76	6.34	3.24
W31	6.16	5.16	3.08	1	4.56	7.5	17.12	17	13.8	0.189	12	17.4	5.4	5.33	5.26	3.24	0.103	5.58	7.88	12.3	13.42	5.68	6.2	6.12		2.5	2.27	1	2.473	3.8	4.58	5.6	0.82	5.02	0.426	4.24	9.72	6.26	5.28	5	4.62	6.04	4.78	3.52	3.64	5.08	8.48	4.96	5.06
W33	1.2	0.84	0.45	0.058	0.084	0.75	4.3	0.665	1.5	0.915	4	6.7	0.862	0.56	0.262	0.097	0.243	5.06	0.962	4.26	5.38	3.6	3.84	6.18		2.6	0.461	2.44	4.795	4.94	4.4	4.96	5.821	5.06	1.438	0.6	6.94	4.82	2.78	2.8	4.76	2.84	4.03	5.22	2.84	5.3	6.34	3.56	4.98
W13	5.92	5.92	5.28	4.64	3.18	5.34	17.02	7.65	8.42	9.32	15.1	7.3	6.44	5.42	10.2	8.3	6.12	0.634	6.8	8.52	6.56	7.34	6.28	6.46		3.1	3.85	5.1	4.058	4.1	1.25	3.72	2.6	5.64	5.02	7.44	19	5.72					4.52	4.52	3.72	4.84	5.48	5.44	4.42
W12	1.22	1.11	0.9	0.63	3.52	4.26	17.12	7.56	14.3	3.12	6.84	4.86	6.9	5.27	3.64	0.94	0.093	12.2								3.2	4.25	3.56	5.282	5.1	3.8	1.44	5.76	5.3	5.06	7.98	5.86	4.82	3.84	4.3	4.84	5.26	3.81	2.36	0.277	4.9	6.08	4.56	4.26
W23	3.16	2.96	3.06	3.16	2.8	5.18	2.04	0.386	0.051	0.81	2.68	4.46	0.943	0.75	0.56	0.84	3.8	3.8	6.52	3.3	5.28	7.22	4.36	3.36		3.3	3.935	4.6	4.784	4.88		6.82	5.675	3.632	4.74	4.1	3.34	7.16	6.02	4.7	3.42	4.52	3.44	2.36	0.985	3.96	3.06	4.28	3.64
W34	0.169	0.14	0.105	0.313	0.221	0.168	2.06	0.063	0.031	1.58	0.099	0.241	0.336	0.431	0.34		0.248	0.349	0.58	0.775	0.585	0.3	0.317	0.99		3.4	4.09	3.6	5.704	6.62	6.12	4.96	5.9	4.23	4.5	4.82	9.68	4.14	2.2	3.3	4.38	4.02	4.73	5.44	3.6	3.62	8.24	4.58	5.78
W35	4.6	4.4	3.39	2.38	4.08	3.2	2.96	3.94	4	6.52	4.44	3.74	2.34	2.8	3.26	5	2.86	3.22	2.6	4.18	6.78	4.5	6.04	2.9		3.6	4.34	7.44	5.508	5.86	4.24	4.65	4.3	6.88	5.38	8.28	9.9	8.36	2.62	8.3	6.02	4.96	4.53	4.1	4.62	3.6	5.72	5	4.42
W8	3.9	3.6	3.17	2.74	2.58	3.62	13.5	5.48	7	3.92	4.92	5.22	2.24	2.24		2.4	0.136		4.6	5.26	3.8	4.72	4.58	5		3.8	2.118	0.65	0.512	0.595	3.64	6.98	6.54	5.86	4.18	2.78	6.34	2.76	3.08	4	4.96	2.98	3		3.76	4.68	4.8	2.96	2.68
W2	1.63	0.85	0.69	0.53	0.64	5.14	13.72	7.58	3.76	0.824	0.294	9.8	0.26	0.31	0.361	5.22	0.312	2.5	10.1	5.16	4.7	4.28	4.72	4.12		4.1	1.931	0.938	0.949	0.96	0.61	3.36	9.16	1.365	0.665	3.58	5.66	4.42	0.855	5.9275	4.34	0.685	0.8325	0.98	10	1.68	5.54	4.42	2.1
W6	6.9	6.48	6.58	4.48	6.16	4.8	19.1	6.78	5.68	6.55	6.24	11.5	6.24	7.3	7.84	4.08	5.2	6.02	4.52	4.96	6.74	7.92	7.2	8.76		4.3	3.52	2.625	3.12	2.435	3.66	1.88	3.54	2.48	6.8	2.52	5.38	3.1	5.28	4.56	6.43	6.87	1.9	2.44	0.825	11.3	2.96	3.2	5.3
W36	5.6	5.26	8.08	7.9	5.58	6.76	11.26	11.34	15.7	3.12	1.78	10.1	5.42	6.63	7.84	3.18			5.52	6.36	7.2	7.86	7.08	6.8		4.4	4.77	3.45	2.617	2.56	2.26	3.38	2.22	3.56	4.06	5.22		1.76	5.22	9.56	11.9	2.72	3.24	3.76	0.261	3.42	6.92	5.42	5.6
W16	9.38	9.38	10.2	11	5.522	13.4	14.4	2.24	13.78	7.08	4.58	2.4	1.01	1.93	3.76	12.44	3.04	9.16	8.56	6.86	15.9	10.02	6.08	9.22		4.5	4.11	4.93	5.68	5.86	5.48	2.44	2.855	7.36	3.98	6.1	9	5.26				4.7	4.96	5.22	4.98	4.78	7.24	2.96	2.7
W3	0.89	0.96	0.53	0.096	0.202	0.411	7.76	0.247	2.48	13	0.089	2.78	2.25	2.2505	0.641	0.117	0.013	0.195	3.04	0.06	3.76	2.6	4.12	4.28		4.6	0.859	0.9	0.936	1.941	1.138	0.492	4.66	2.76	0.801	3.167	4.08	2.283	2.27	0.4	0.435	1.96	2.35	2.74	4.68	2.94	2.64	3.78	4.61
W37	3.01	0.305	0.23	2.294	2.51	0.705	7.22	11.2	2.66	0.725	2.12	0.104	0.068	0.289	0.51	0.603	4.12	0.9	4.12	3.88	7.52	2.4	2.54	3.72		5.2	2.235	3.08	4.00667	1.12	1.12	2.102	10.2	8.66	8.06	3.38	7.04	6.54	2.02	3.4	4.78	3.12	3.17	3.22	3.36	3.98	5.02	4.92	5.94
W38	6.1	5.4	4.75	4.1	4.56	5.14	11.26	0.75	7.16	0.94	4.84	5.4	4.6	4.63	4.66	3.4	2.64	3.56	5.12	3.54	6.56	6.96	5.26	5.02		7.2	0.94	0.8	0.973	0.8	0.29	0.585	0.81	0.135	5.06	0.6	6.94	4.82					3.58	3.58	2.54	4.04	3.14	3.4	4.8
W39	2.65	0.297	0.27	2.247	2.7	4.58	7.9	10.2	15.4	5.7	0.93	0.8	0.814	1.44	2.06	1.01	0.243	3.48	6	6.7	13.2	6.42	5.7	1.8		7.3	0.3	0.1	0.656	0.64	0.781	0.317	0.281	0.167	0.89	5.92	4.3	0.57	0.09	1.6			4.3	4.3	4.26	3.14	4.54	6.1	3.8
W32	0.89	0.87	0.47	0.061	0.121	0.705	0.134	3.64	11.4	0.56	0.091	6.2	2.08	1.21	0.33	0.83	0.249	2.36	2.3	3.84	5.56	2.92	2.4	4.12		7.4	2.885	3.01	4.202	4.54	2.58	2.75	5.24	4	3.34	1.01	1.76	4.22	0.302	6.7	9.1	3.08	1.96	0.841	5.22	4.42	5.74	2.96	2.32
W25	0.122	0.57	0.97	0.55	0.124	0.271	5.5	3.64	11.3	1.12	0.842	2.54	3.78	0.631	0.642	0.653	5.2	3.36	3.78	6.74	7.2	3.86	4.06	3.72		8.1	3	5.34	5.78	5.34	3.16	0.8	4.68	2.4	2.24	6.48	5.46	2.72	4.04	4.44	4.84	1.277	0.75	0.23	0.941	2.08		4.12	5.6
W40	10.1	9.22	8.66	7.1	2.6	3.54	3.1	6.39	1.18	12.3	2.1	14.1	8.3	7.65	7	0.642	4.32	4.46	0.206	4.58	6.98	6.42	5.28	6.56		9.1	0.687	0.687	0.1688	0.197	0.073	11.8	14.7	0.795	5.22	9.8	0.723	0.78					4.82	4.82	5.4	2.02	2.64	1.68	2.92
W41	2.41	2.96	2.95	0.93	2.6	3.4	4.67	11.2	4.86	2.24	0.91	5.48	0.232	0.35	0.461	4.06	0.98	0.466	3.56	3.66	3.8	5.44	4.86	0.28		9.4	3.22	3.785	4.38	4.58	3.7	4.06	9.7	3.78	4.02	3.54	3.56	3.94	2.92	4	4.06	4.1	4.68	5.26	5.76	4.66	5.02	6.4	5.7
W24	0.12	0.12	0.13	0.148	0.228	3.98	0.695	3.1	15.7	0.76	0.05	0.049	0.842	0.57	0.302	0.665			2.66	5.4	6.04	3.1	5.52	3.28		9.5	4.54	5.46	1.167	0.306	0.213	0.174	2.6	0.38	4.3	3.12	9.1	6.42	5.22	5.5	3.74	3.66	3.11
W20	7.04	7.04	7.38	1.72	7.36	4.8	7.93	4.57	18.3	9.26	3.32	19.6	2.9	3.66	4.42	8.6	7.5	16.2	17.5	17.9	20.2	18.9		14.4		11.2	3.015	4.38	5.765	5.42	1.01	1.083	2.825	0.985	0.955	4.28	4.3	5.6	3.36	3.1	2.78	2.7	4.13	5.56	0.36	2.58	4.24	4.9	4.44
																										11.3	4.47	4.36	4.24	5.1	3.24	0.56	2.44	1	4.96	5.74	3.26	4.02	3.12	3.9	4.62	3.98	5.01	5.96	2.82	2.84	3.52	5.56	4.86
																										11.4	1.254	0.1	2.38	3.38	0.343	3.7	2.14	2.4	0.54	4.22	4.66	2.84	1.42	1.9	1.91	4.22	3.06	1.9	2.12	3.96	4.6	5.22	2.96
																										12.2	3.055	2.925	3.43	4.56	1.24	0.216	1.54	0.328	4.24	3.12	7.28	5.16	2.242	3.6	3.551	4.68	4.75	4.82	3.88	3.08	5.24	4.98	4.48
																										12.3	4.03	4.23	3.84	4.1	0.915	6.36	9.8	7.52	4.82	4.92	9	6.78	5.22	4.6	3.98	3.34	3.53	3.72	3.92	3.22	7.26	5.82	5.8
																										12.4	3.56	3.58	4.342	5.26	3.2	1.113	2.755	4.16	3.94	7.04	4.16	5.72	5.04	6.4	5.7	4.28	4.11	3.94	4.48	6.94	5.2	5.44	4.12
[truncated: 1 more columns]

## Sheet: Ammonium
Dangishta																											Robit Bata
Well ID	2017-01-17	2017-02-18	2017-03-22	2017-04-23	2017-05-25	2017-06-26	2017-07-28	2017-08-29	2017-09-30	2017-10-01	2017-11-01	2017-12-03	2018-01-04	2018-02-05	2018-03-09	2018-04-10	2018-05-12	2018-06-13	2018-07-15	2018-08-16	2018-09-17	2018-10-19	2018-11-20	2018-12-22			Well	2017-01-17	2017-02-18	2017-03-22	2017-04-23	2017-05-25	2017-06-26	2017-07-28	2017-08-29	2017-09-30	2017-10-30	2017-11-01	2017-12-03	2018-01-04	2018-02-05	2018-03-09	2018-04-10	2018-05-12	2018-06-13	2018-07-15	2018-08-16	2018-09-17	2018-10-19
W9	n.d	0.02	0.01	n.d	n.d	n.d	n.d	0.035	n.d	0.01	n.d	n.d	0.06	n.d	0.05	0.05	0.01	0.01	0.04	n.d	n.d	n.d	0.04	0.02			1.1	0.03	n.d	0.052	0.1	0.09	0.01	n.d	0.03	n.d	0.08	0.07	n.d	n.d	0.01	0.01	0.01	0.005	0.005	n.d	n.d	0.01	0.46
W4	0.09	0.09	0.08	0.07	n.d	n.d	0.13	0.03	0.06	0.06	0.35	0.01	n.d	0.22	0.22	n.d	0.04	0.04	0.02	0.03	n.d	n.d	n.d	0.73			1.2	n.d	n.d	0.08	0.11	0.04	0.13	0.13	0.08	0.15	0.03	0.16	n.d	n.d	n.d	n.d	n.d	0.05	0.05	0.82	0.02	0.13	0.01
W19	0.015	0.015	0.001	0.6	0.74	0.03	0.03	0.01	n.d	0.01	0.08	n.d	n.d	0.22	0.22	0.13	0.57	0.57	n.d	0.01	0.03	0.05	0.01	0.02			1.6	n.d	n.d	0.03	0.01	0.04	0.09	0.03	n.d	0.03	n.d	0.02	0.25	n.d	n.d	n.d	n.d	0.005	0.005	0.02	0.07	n.d	n.d
W5	0.85	0.83	0.735	0.64	0.5	0.11	0.05	0.03	n.d	0.01	0.01	n.d	n.d	0.23	0.45	0.92	0.5	0.5	0.08	0.01	0.04	0.01	0.03	0.07			2.1	0.09	n.d	0.09	n.d	0.003	0.005	0.04	0.005	0.01	0.06	0.005	0.01	0.02	0.02	n.d	n.d	n.d	0.01	n.d	0.01	0.05	0.01
W17	n.d	n.d	n.d	0.01	0.02	n.d	0.315	0.04	n.d	0.31	n.d	n.d	n.d	0.04	0.04	n.d	2.6	2.6	n.d	0.04	0.29	0.06	n.d	0.01			2.3	0.32	0.01	0.043	0.09	0.08	0.05	0.17	0.13	0.17	0.08	0.11	0.005	0.005	0.01	0.01	n.d	0.2	0.2	0.02	0.05	n.d	0.91
W43		n.d	n.d	0.04	0.06	0.05	n.d	0.02	n.d	n.d	0.03	n.d	0.05	0.06	0.07	0.02	0.3	0.3	0.02	0.31	0.49	n.d	0.05	0.92			2.4	n.d	0.01	n.d	n.d	0.07	n.d	0.22	0.05	0.11	0.13	0.17	0.02	0.01	0.01	n.d	n.d	0.04	0.04	0.48	n.d	0.01	0.03
W31		n.d	n.d	0.09	n.d	n.d	n.d	0.02	0.01	n.d	0.45	0.13	n.d	0.05	0.05	0.08	0.25	0.25	n.d	n.d	n.d	0.66	0.08	0.04			2.5	0.12	0.13	n.d	n.d	0.06	0.15	0.41	0.023	n.d	0.03	0.13	0.01	n.d	n.d	n.d	0.13	0.07	0.02	0.02	n.d	0.04	0.03
W33	0.07	0.07	0.175	0.28	0.12	n.d	0.08	0.01	0.02	0.02	0.43	n.d	n.d	0.29	0.29	0.76	0.02	0.02	0.06	0.02	0.09	n.d	0.07	0.16			2.6	0.01	0.01	0.01	0.15	0.05	0.23	0.21	0.123	0.005	0.12	0.16	n.d	n.d	n.d	n.d	0.03	0.03	0.02	0.02	0.03	0.03	0.04
W13	n.d	n.d	n.d	0.04	0.11	0.43	0.13	0.43	0.09	0.14	0.65	n.d	0.07	0.04	0.01	0.02	0.1	0.1	0.01	0.07	0.11	0.03	0.01	0.03			3.1	0.05	n.d	0.104	0.13	n.d	0.13	0.01	0.24	0.3	0.07	0.09	0.09	n.d	n.d	n.d	n.d	0.07	0.07	0.05	0.3	n.d	0.08
W12	0.17	0.17	0.165	0.32	0.97	0.25	0.06	0.03	n.d	0.4	n.d	n.d	0.085	0.3	0.014	0.7	4.4	0.05									3.2	0.35	0.01	0.024	0.08	0.15	0.15	0.1	0.23	0.25	0.005	0.11	n.d	n.d	n.d	n.d	n.d	0.07	0.07	0.02	0.02	n.d	0.44
W23	0.021	0.02	0.01	n.d	0.02	n.d	0.076	n.d	0.02	0.074	0.02	0.033	0.07	0.1	0.13	0.03	n.d	4.4	0.06	0.05	0.05	0.01	0.09	0.06			3.3	0.17	0.06	0.114	0.12		0.12	0.22	0.14	0.15	0.05	0.06	0.15	n.d	n.d	n.d	n.d	0.09	0.09	0.09	n.d	0.69	0.12
W34	n.d	0.04	0.04	0.04	0.01	0.69	0.07	0.03	0.12	0.01	0.06	n.d	n.d	0.013	0.02	0.02	0.08	n.d	0.11	0.01	0.01	0.32	0.55	0.14			3.4	0.22	n.d	0.017	0.07	0.07	0.17	0.17	0.012	n.d	n.d	0.11	n.d	0.01	0.01	n.d	0.08	0.04	n.d	n.d	n.d	0.03	0.01
W35	n.d	n.d	n.d	n.d	n.d	n.d	n.d	n.d	n.d	0.31	0.38	n.d	n.d	0.14	0.14	0.01	n.d	0.08	0.03	n.d	0.01	0.01	0.01	0.1			3.6	0.025	n.d	0.03	n.d	0.09	n.d	0.15	0.03	0.02	0.08	0.1	n.d	0.005	n.d	n.d	n.d	0.01	0.01	n.d	n.d	n.d	0.01
W8	n.d	n.d	n.d	n.d	n.d	0.07	0.11	n.d	0.03	0.03	n.d	n.d	n.d	n.d	n.d	0.02	0.06		0.01	0.02	n.d	0.39	0.03	0.69			3.8	n.d	n.d	n.d	0.07	0.05	n.d	0.08	0.07	0.07	0.01	0.05	n.d	n.d	n.d	n.d	0.01	0.13	0.08	n.d	0.04	n.d	0.19
W2		n.d	0.01	n.d	n.d	n.d	0.05	n.d	n.d	n.d	n.d	n.d	n.d	0.02	0.02	n.d	n.d	0.06	0.69	0.01	0.02	0.04	n.d	0.06			4.1	n.d	n.d	0.07	0.13	n.d	0.13	0.14	n.d	0.005	0.08	n.d	0.11	0.01	0.01	n.d	0.17	0.13	0.08	0.06	n.d	0.03	0.06
W6	n.d	n.d	0.021	0.08	n.d	n.d	n.d	0.05	0.01	0.01	0.06	n.d	n.d	0.02	0.06	n.d	n.d	n.d	0.03	n.d	n.d	0.03	0.1	0.48			4.3	n.d	n.d	n.d	0.03	0.21	0.06	0.23	0.11	0.11		0.13	n.d	0.04	n.d	n.d	0.1	0.1		0.01	0.01	0.01	0.03
W36	n.d	n.d	n.d	n.d	0.03	n.d	0.01	n.d	0.01	n.d	0.01	n.d	n.d	0.06	0.06	0.01	n.d	n.d	0.22	0.03	0.05	n.d	n.d	0.005			4.4	n.d	0.005	0.01	0.12	0.07	n.d	0.11	0.18	0.12	0.01		0.01	n.d	0.01	0.01	n.d	0.02	0.02	0.02	n.d	0.02	0.11
W16	n.d	0.01	0.05	0.09	0.04	0.04	0.65	0.15	0.02	n.d	n.d	0.06	n.d	0.14	0.14	0.32	0.3		0.05	0.01	0.07	0.01	1	0.17			4.5	0.1	0.005	n.d	0.11	0.1	0.18	0.16	0.02	0.09	0.005	0.15	n.d			n.d	n.d	0.005	0.005	0.1	0.02	0.05	0.02
W3	0.02	0.02	0.02	0.02	0.01	n.d	0.13	0.02	0.01	n.d	n.d	n.d	0.05	0.045	0.01	0.01	0.01	0.3	n.d	n.d	0.02	0.04	0.01	0.07			4.6	0.11	0.06	0.04	0.22	0.31	0.2	0.18	0.05	0.01	0.12	0.04	0.28	0.06	0.06	n.d	0.26	0.15	0.04	0	n.d	0.02	0.08
W37		n.d	n.d	0.01	0.02	n.d	n.d	0.08	n.d	n.d	0.01	0.22	n.d	n.d	0.01	0.01	0.04	0.01	0.92	n.d	0.3	n.d	0.08	0.01			5.2	0.22	n.d	0.11	0.2	0.18	0.24	0.15	0.11	0.1	0.07	0.1	0.32	n.d	n.d	n.d		0.01	0.01	0.09	0.01	0.02	0.51
W38	0.001	0.03	0.035	0.04	n.d	0.02	0.02	0.01	0.09	n.d	0.1	0.01	n.d	0.01	0.04	n.d	0.03	0.04	0.02	0.01	0.03	0.2	0.55	0.26			7.2	n.d	0.05	0.02	0.005	0.04	0.05	n.d	n.d	n.d	0.12	0.16	n.d	n.d	n.d	n.d	n.d	0.15	0.15	0.34	n.d	0.49	0.01
W39	0.05	0.05	0.195	0.34	0.01	0.24	0.01	0.23	0.01	0.03	0.01	n.d	n.d	n.d	n.d	n.d	0.84	0.03	n.d	0.05	0.02	0.01	0.05	0.09			7.3	n.d	n.d	0.05	n.d	n.d	n.d	n.d	0.04	0.04	n.d	0.005	0.12	n.d	0.05	n.d	n.d
W32	0.11	n.d	n.d	n.d	0.1	0.04	n.d	n.d	n.d	0.01	0.01	n.d	n.d	n.d	0.01	0.01	0.04	0.84	n.d	0.05	n.d	0.03	0.01	0.02			7.4	0.05	0.05	0.2	0.18	0.02	0.22	0.17	0.15	n.d	0.01	n.d	0.22	n.d	n.d	n.d	0.03	0.02	0.01		0.04	0.05	0.02
W25	0.02	n.d	n.d	n.d	0.03	0.03	0.02	n.d	0.01	0.24	0.01	n.d	n.d	n.d	n.d	0.001	0.01	0.04	n.d	n.d	0.01	0.01	n.d	0.94			8.1		0.3	n.d	0.18	0.34	0.21	0.13	n.d	n.d	0.22		n.d	n.d	n.d	n.d	n.d	0.005	0.005	0.08	0.05	n.d	0.05
W40	0.01	0.04	0.055	0.07	0.01	n.d	0.01	0.03	0.01	0.17	0.31	n.d	n.d	0.03	0.03	0.02	0.04	0.01	0.08	0.14	0.07	0.02	0.06	0.08			9.1	0.02	0.01	0.089	0.13	0.69	0.51	0.1	0.15	0.09	0.17	0.4	0.83	0.66	1.53	2.4	0.93	0.03	0.03	0.21	n.d		0.17
W41	n.d	n.d	n.d	n.d	0.01	0.01	0.05	n.d	n.d	n.d	n.d	0.09	n.d	0.03	0.03	0.01	n.d		0.03	0.01	0	0.01	0.05	0.005			9.4	0.05	0.01	n.d	n.d	0.11	0.21	0.16	n.d	0.03	0.02	n.d	0.28	n.d	n.d	n.d	0.06	0.05	0.03	0.63	0.14	0.01	n.d
W24	0.4	0.4	0.65	0.9	0.03	0.08	0.29	0.1	n	0.12	0.05	0.12	0.03	0.42	0.8	0.42		0.04	0.004	0.03	0.05	0.11	0.07	0.005			9.5	0.04	0.03	0.04	0.16	0.29	0.13	0.21	0.02	0.005	0.11	0.17	0.25	n.d	n.d	n.d	0.17	0.17		0.06	0	0.02	0.01
W20	0.03	0.03	0.065	0.1	0.05	0.02	0.03	0.15	0.005	0.005	0.31	0.03	n.d	0.02	0.02	0.2	0.08	n.d	0.04	n.d	0.07	0.01		0.07			11.2	0.07	0.07	0.04	0.129	0.247	0.03	0.083	0.009	0.011	0.09	0.03	n.d	0.003	0.01	0.015	0.209	0.16	0.11
																											11.3	n.d	n.d	0.03	0.13	n.d	0.16	0.078	n.d	0.02	0.09	n.d	0.205	n.d	n.d	n.d	n.d	0.13	0.13	0.07	0.07	0.13	0.21
																											11.4	n.d	n.d	n.d	n.d	0.21	n.d	0.1	0.005	0.02	0.12	0.005	0.27	0.01	0.01	n.d	0.22	0.17	0.11	n.d	0.01	n.d	0.04
																											12.2		0.04	0.07	0.12	0.25	0.14	0.18	n.d	n.d	0.17	0.04	n.d	n.d	n.d	n.d		0.005	0.005	0.17	0	0	0.01
																											12.3	0.037	0.037	0.05	0.13	0.15	0.14	0.14	n.d	0.04	0.02	0.005	n.d	0.005	n.d	n.d	0.12	0.07	0.005	0.01	n.d	0.56	n.d
																											12.4		n.d	n.d	n.d	n.d	0.1	0.07	0.03	0.13	0.15	0.005	0.26	n.d	n.d	n.d	0.11	0.06	0.005	n.d	n.d	0.01	n.d
[truncated: 2 more columns]

## Sheet: Chloride
Dangishta																										Robit Bata
Well ID	2017-01-17	2017-02-18	2017-03-22	2017-04-23	2017-05-25	2017-06-26	2017-07-28	2017-08-29	2017-09-30	2017-10-01	2017-11-01	2017-12-03	2018-01-04	2018-02-05	2018-03-09	2018-04-10	2018-05-12	2018-06-13	2018-07-15	2018-08-16	2018-09-17	2018-10-19	2018-11-20	2018-12-22		Well ID	2017-01-17	2017-02-18	2017-03-22	2017-04-23	2017-05-25	2017-06-26	2017-07-28	2017-08-29	2017-09-30	2017-10-30	2017-11-01	2017-12-03	2018-01-04	2018-02-05	2018-03-09	2018-04-10	2018-05-12	2018-06-13	2018-07-15	2018-08-16	2018-09-17	2018-10-19	2018-11-20
W9	0.12	0.1	0.05	n.d	3	11	1	2	2	5	15	2	5	2	4	2.5	n.d	2	4	28	56	3	5	2		1.1	1	5	0.7	4	5		5	4	5	5	6	4	3	4	5	2	1.5	1	1	4	n.d	2	65
W4	1.1	1	0.5	n.d	n.d	n.d	3	6	n.d	4	4	13	n.d	3	6	n.d		9	n.d	2	4	5	1	0.4		1.2	3.6	7	2.3	2			7		2	4	4	5				3	1.5	n.d	1	2	2	4	14
W19	0.1	n.d	14	3.1	4.6	n.d	8	10	10	5	9	4	n.d	1.5	3	n.d			6	3	2	1	2	0.8		1.6	9.8	2	2.5				4	15	2		12	3	1	4.5	8	2	2	n.d	0.6	n.d	4	n.d	19
W5	0.12	n.d	9	17	n.d	8	9	14	6	18	8	5	6	3	n.d	32			14	2	17	11	11	0.6		2.1	n.d	1	2.4	2	2	n.d	1	2	2	n.d	9	1	n.d	1	2		n.d	n.d	15	1	1	3	2
W17	3.2	3	3	3	n.d	n.d	14	6	4	7	6	5	4	1.2	2	n.d	2		6	28	6	5	15	0.7		2.3			1				5	3	7	4	6	5		2	4	1	2.5	4	11	1	n.d	8	68
W43	4	4	2	5	n.d	2	7	17	2	17	5	7	n.d	1	2	n.d	1	1	5	28	21	13	19	1		2.4	6.1	1	0.5	3	2		5	6	5	3	5	4	2	1		1	0.5	n.d	4	n.d	19	14	2
W31	4	4	2	n.d	n.d	2	7	17	4	4	7	6	6	5	4	n.d	6		2	6	13	5	2	0.7		2.5	6.3	1	2.1	4	2			5	8	3	7	2	2	1.5	1	2	7.5	13	n.d	1	8.3	5	43
W33	1.1	1	2	2	n.d	n.d	n.d	n.d	4	4	11	2	n.d	3	2		2	6	6	n.d	4	5	6	0.6		2.6	1	7	1.1		4			6	4	3	6	3	2	1			n.d	n.d	1	1	5	5.1	4
W13	0.2	n.d	3	5	6	4	35	7	12	20	8	15	5	7.5	10	5	2		3	21	19	27	22	12.5		3.1	3.7	n.d	0.89	1	5	n.d	n.d	10	4	14	4	4					n.d	n.d	2	n.d	n.d	3	27
W12	9	10	8	5	7	n.d	23	12	24	24	9	7	7.21	6	7.57	7	n.d									3.2	1.3	6	6	5	6	3.5		6	3	1	6	6	2	1			n.d	n.d	3	n.d	12	4	1
W23	3.8	4	3	2	2	n.d	19	12	2	11	7	1	1.1	1	1.4	n.d	n.d	2	9	35	2	8	1	1.2		3.3	1.6	4	2.5	3			6	2	6	2	6	1	1	0.5			1	1	8	2	7.8	1	5
W34	5	3	n.d	2.5	2	5	9	6	n.d	5	6	1	1.5	2	1.2	2	1.2	2	9	7	6	3	22	1.3		3.4	5.5	2	n.d		2	2	7	4		6	7	5	5	3	1	2	1	n.d	n.d	1	4	12	2
W35	4.2	5.1	2.7	3	0.005	1	1	4	2	6	12	2	5	3	1				2	6	4	4	6	0.4		3.6	5.9		1.1	2	5		5	6	6	6	3	3	2	0.5	1	6	4	2	2	n.d	5	1	4
W8	2.2	2	1	n.d	1	n.d	25	6	8	5	1	2	2	2		n.d	n.d		n.d	8	6	8	8	0.4		3.8	4.5	2	2.6	3	4		4	2	6		7	1	n.d	0.5	1				1	2	n.d	n.d	11
W2	7.3	8	5	1	n.d	n.d	12	82	6	9	13	15	9	7	5	2			62	4	16	9	13	0.8		4.1	1.9	4	2	2		5	4	5		5	4	4	3	1.5			n.d	n.d	8	3	1	6	2
W6	4.3	4	5	5	1	n.d	26	1	1	7	5	n.d	6	4.5	2	1	1		n.d	4	8	4	13	0.005		4.3	1.6	1.8	1	4.9	5	1		4	9		6	4	2			2	1	n.d	2	n.d	9	4	n.d
W36	4.2	4	3	1	n.d	n.d	2	8	10	4	4	1	2	2	2	n.d			1	7	0	20	2	0.7		4.4	10		2.4	4	2		3	4	9	7			5	2.5		4	2	n.d	n.d	n.d	10	10	5
W16	10	11	14	17	10	6	32	21	2	9	19	10	2	5	8	9	4		9	12	11	17	14	0.7		4.5	5.7	3	1.1	1		1	6	6	9	4	6	4		1	1	1	0.5	n	n.d	6	13	11	4
W3	2.6	2	1			n.d	19		2	2			9	9	2	25	n.d	7	0	9	4	11	8	0.6		4.6	8.1		1.4	1	3	3	4	3		2	5	n.d		6.5	1	7	3.5	n.d	n.d	2	1	5	4
W37	3	2	2	2			12	8	2	2	3	7	2	1.5	1	3		2	43	7	17	7	5	1.3		5.2	0.9	2	0.7	2	4	2	3	3	7		6	4					n.d	n.d	23	31	4	38	4
W38	1.3	1	4	6	2	n.d	6	14	9	8	8	17	4	5	6	1	1		5	5	1	8	4	2.3		7.2	0.1	1	0.2	n.d	10	n.d	n.d	n.d	2	1	6	3					1	1	11	n.d	1	35	8
W39	2.1	2	2	2	3	n.d	27	17	11	6	2	2	2	1	n.d	n.d	n.d	6	3	3	6	3	11	0.9		7.3	4.8	n.d	2.2	n.d	1	n.d	1	4	n.d	4	4	2					n.d	n.d	n.d	3	4	2	3
W32	6	5	3	1			13	5	14	7	6	1	1	1	1	5			29	4	6	13	5	1.6		7.4	3.1	4.7	1.4	4	5		4	4			5	3	1	1	1		n.d	n.d	2	3	6	7	4
W25		3	2	2	1	5		8	21	1	10	8	6	2	2.5	3	2	1	13	5	n.d	3	9	1.1		8.1	4.3		6.4	6	4	1	5			10	9	8	10	7	4	1	14	15		n.d		5	6
W40	20	25	27	29	13	14	50	28	1	29	5	n.d	17	17.5	18	3	7	1	5	10	22	8	17	2.6		9.1	1.8	1.8	1.87	2	n.d	11	n.d	n.d	n.d	n.d	n.d	4					1	1	2	n.d	n.d	n.d	4
W41	4	3	3	3	n.d	n.d	12	6	4	5	2	2	5	5	5	1		2	7	4	3	3	8	0.005		9.4	2.4	3	1.1	5	4		7	5	5	4	5	4	n.d	2		4	2	n.d	1	n.d	7	11	6
W24	n.d	n.d	n.d	n.d	2.4	n.d	7	5	20	6	n.d	2	11	6.5	2	n.d			1	32	4	3	n.d	1.2		9.5	5.6	3	2		1		5	7		2	5	5		2.5	5
W20	27	27	31	35	19	55	61	27	25	24	12	7	29	25	21	19	11		17	19	11	15		3.1		11.2	10.5	13	6.5	1	11		8	9	5	4	7	4	2	3	4	9	4.5		1	n.d	1	9	7
																										11.3	16		6	8	4		1		9	11	11	7	1	16	5.1	6	3			5	15	5	8
																										11.4	7.5	9	5.4	5.4	2		4	10	9	5	4	7				2	1		1	2	5	6	n.d
																										12.2	3.4	2	2.1	3	3		2		4	2	11	5	1	2.5	2.5		n.d	n.d	10	n.d	10	4	7
																										12.3	2.3	1.3	1.6		4		8	4	6	4	4	5	n.d	1.5	3		n.d	n.d	1	3	16	n.d	3
																										12.4	4.3	4	3.6				1		6	5	n.d	9		6	4		n.d	n.d	12	5	4	6	4
[truncated: 1 more columns]

## Sheet: Potassium
Dangishta														Robit Bata
Well ID	Jan	Feb	Mar	Apr	May	Jun	Jul	Aug	Sep	Oct	Nov	Dec		Well ID	Jan	Feb	Mar	Apr	May	Jun	Jul	Aug	Sep	Oct	Nov	Dec
W9	1.2	0.6	0.75	0.9	1.3	1	2.7	0.7	0.7	1.2	0.4	1.1		1.1	0.366667	2	2.133	1.4	1.1	0.4	1.4	1.8	0.2	0.2	0.9	0.5
W4	1.8	1.6	1.75	1.9	0.6	1.3	3	1.5	3.3	2.1				1.2	3.4	1.1	4.7	2.1	1.2	0.5	1.9	0.5	0.5	1.8	0.8	0.6
W19	2.11	2.6	2.85	3.1	4.6	0	1.2	1.3	0.9	0	0.4	0.5		1.3	0.3	2.2
W5	4.4	4.4	4.5	4.6	4.5	2.7	1.8	2.8	4.7	1.8	1.8	2.2		1.4	0.333333	2.3
W17	0.3	0.2	1.05	1.9	0.2	0.2	0.4	0.9	1.4	1.4	0.1	0.4		1.6	0	0	2.5	0.6	0.3	1	1.3	0.8	2.6	0.4	1.3	0.3
W43	0.8	0.7	1.8	1.3	2.2	2	0.8	0.5	1.2	0.1				2.1	4.1	0.3	0.4	1.4	2.7	2.7	1.3	0.7	0.4	0.3	0.9	0.9
W31	1.9	1.8	2.8	2.9	1.3	0.7	1.8	1	1.5	0.4	0.5	2.1		2.2	1.8	0.4	1.333	1.5	1.9	0.7	0.3	0.9	0.6	2	1.8	1.3
W33	0.01	0	0.7	3.8	2.2	1.7	2.6	1.3	1.5	1.5		0.9		2.3	1.23333	0	1.8	0.7	0.8	1	0.6	1.8	2.1	2.6	1.4	0.5
W13	0.26	0.3	0.5	1.4	1.3	1.2	2.4	2.2	1.4	1.4				2.4	0	0.7	0.967	1	1.7	1.2	3.7	1.8	1.7	2	1.8	1.8
W12	2.1	2.7	3.1	0.7	0.9	1.2	1.4	1	1.5	0.4	1.3	1.6		2.5	1.43333	0.5	1.7	1.4	1.4	0.4	3.3	1.3	2.5	0.8	2.3	1.1
W23	0.5	0.7	0.55	5.5	4.5	2.5	2.1	2.2	3.2	1.4	1.1	0.9		2.6	0.2	1.1	3.1	1.8	1.4	3	3.4	1.8	0.8	1.5	2.4	0.79
W34	3.1	2.5	2.3	0.4	0.2	0.6	2.2	0.9	0.2	2.1		1.1		3.1	3.1	2.1	1.533	1.8	1.4	2.3	1.9	2.1	2.2	1.9	2.1	2.6
W35	0.53	0.6	1	2.1	0.5	4.1	1.42	2.7	1.7	1.3	1.7	1.4		3.2	1.53333	0.8	1.6	1.5	1.4	1.4	2	2.6	3.6	1.5	1.3	0.89
W8	1.1	1.2	0.75	1.4	0.6	0.7	1.3	1.3	0	1.4	1.3	0.9		3.3	0.3	2	1.667	1.4		2.4	2.9	1.3	1	0.7	0.8	0.7
W2	1.2	1.5	1.45	0.3	1.4	1.4	1.4	1.4	0.4	1	1.5	1.3		3.4	0.566667	2.2	1.967	1.7	1.8	1.5	12	2.7		1.1	1.1	1.2
W6	0.3	0	0.65	1.4	1.8	1.7	2.6	2	2	1.6	1.1	1.2		3.6	2.6	1.5	1.8	1.2	1.6	1.2	1.5	0.5	0.5	2.1	1.7	0.9
W36	0.5	0.5	0.65	1.3	1	1.1	3.1	0.4	1.3	1.8	1.3	1.1		3.8	2.1	0.3	2.8	1.9	1.2	0.2	1	1.1	4.9	0.8	2	1.6
W16	1.6	1.8	1.9	0.8	1.6	0.2	0	0.9	3.6	0.9	1.4	1.4		4.1	3.06667	0.4	1.767	1.5	1.3	0.3	1.1	1.2	0.1	1.4	1.4	0.4
W3	2.6	4.5	3.15	2	0.3	4.8	3.9	1.6	0.3	3	0.6	0.8		4.3	3	1.4	1.533	2.7	1.8	2.6	3.7	1.4	1.4	1.3		0.3
W37	0.5	0.6	1.05	1.8	2	0.9	2.3	0.7	1.3	1.3				4.4	3.56667	n.d	1.4	4.02	1.8	0.2	1.5	3.5	1.4	0.9		0.5
W38	2.01	2.1	2.05	1.5	0.8	0.3	0.3	0	0.2	0	1.2	1		4.5	3.4	1	2.033	2.5	1.9	1.5	5.4	1.4	0.6	3.5	1.3	0.1
W39	4.6	5.1	4.5	2	1.9	2.1	0	0.7	2.5	1.5				4.6	0	0.6	2.1	4	2.7	2.3	1.4	0.6	0.1	1.2	0.8	n.d
W32	2.1	2.1	1.85	3.9	2.1	1.3	2.1	2.5	2.7	1.4		3.4		4.7	2.6	0.5
W25	1.4	1.9	2.1	1.6	1.8	2.3	1.8	2.6	2.6	2.4	1.2	1.3		5.1	1.5	0.3
W40	1.12	1.3	1.7	2.3	1.8	0	1.1	2	1.7	0.2				5.2	2.5	1.3	2.367	1.3	1.9	2.4	10	1.2	1.4	0	1	0.7
W41	2.1	3.3	2.3	2.1	4.4	6.7	5.6	3.5	1.9	5				5.3	0.7	2.2
W24	0.6	0.6	0.7	0.8	0.3	0	0.9	1.4	0.4	1.5	0.6	1		5.4	0.433333	1.2
W20	0.5	0.5	0.5	0.5	0.7	0.5	0.9	0.4	0.3	1.2		0.6		7.2	1.13333	1.8	0.266667	0.2	1.2	0	1.3	0.5	2.6	0	1.1	2.1
W24	3.8	3.8	2.9	5	2.4	2.4	2.3	1.8	1.5	1.7	1.7	1.7		7.3	0.333333	n.d	0.767	2.1	0.6	0.7	0.04	0	0	1.4	1.8	1.8
W20	1.4	1.4	1.6	1.8	1.9	1.1	1.4	0.2	2	1.3	1.11	1.2		7.4	1.5	1.02	1.533	3.3	1	2.2	1.5	0.4	0.4	0.4	2.1	2.1
														8.1	2.2	2	2.8	1.2	1.6	0	0.3	1	0	1.6		0.6
														9.1	3.3	3.3	1.267	1.9	0	3.7	38	1.5	1.2	1.5	3.2	2.7
														9.4	0.366667	0.3	1.733	1.2	1.5	0.4	1.4	1.3	1.3	0.4	1	0.6
														9.5	0.266667	1	1.5	0.3	2.6	3.2	1.4	1.2	3.3	3.4	1.5	1.3
														11.1	0.4	0.4
														11.2	0.3	3	0.2	0.6	1.4	1.6	1.3	1.2	0.1	0.1	1.3	1.2
														11.3	3.26667	1.4	0	1.5	0.4	0.2	1.7	0.3	0.9	1.5	0	2
														11.4	0.1	0.3	1.4	0	0.6	0	1.2	0.1	0	0.6	3.2	1.6
														12.2	0.05	0	0	0.6	1.3	0.4	0.7	0.4	1.7	0.9	0.7	0.2
														12.3	0	0	0.467	1.1	0.8	2.1	0.9	1.2	0.6	0.4	0.2	0.3
														12.4	1.83333	2.8	0.367	1.3	1.4	0.6	1.3	0.6	0	0.5	1.1	0.25

## Sheet: Magnisium
Dangishta															Robit Bata
Well ID	Jan	Feb	Mar	Apr	May	Jun	Jul	Aug	Sep	Oct	Nov	Dec			Well ID	Jan	Feb	Mar	Apr	May	Jun	Jul	Aug	Sep	Oct	Nov	Dec
W9	10	12	8	4	7	8	3	6	12	8	17	1			1.1	9	11		10	14	9	7	5	2	7	13
W4	2	1	3	4	3	8	1	5	1	29	15				1.2	16	9		9	9	6	5	13	2	11	7
W19	6	5	3	1	2	1	1	1	10	6	9	10			1.3	14	14	14						2
W5	4	3	5	7	5	7	9	14	4	8	1	1			1.4	18	9
W17	3.2	3	3	2	1	1	7	8	2	1	12	1			1.6	1	1	5	5	4	6	9	7		2
W43	9	9	14	14	9	8	18	13	5	8	8				2.1	4	5	9	9	9	9	14	8	1	13	17	5
W31	10	9	9	18	12	10	6	17	9	7	1				2.2	9	6		11	12	13	15	13	4	12	9
W33	8	7	7	9	5	3	5	5	4	6	1	10			2.3	9	11	8	9	13	13	13	7	12	9	16
W13	6	8	10	7	4	3	4	1	5	1	1				2.4	1	11		1	9	6	20	7	5	13	4
W7	5	5	10	12	9	5	13	16	8	8	18	16			2.5	9	1	4	12	11	10	20	10	4	4	6
W12	7	10	11	15	15	1	41	2	11	1	6	10			2.6	16	9	13	13	15	12	16	14	8	11	12
W23	6	5	6	11	9	10	13	14	10	17	3				3.1	7	13	13	12	13	14	15	9	12	10	3
W34	8	9	12	6	17	2	1	1	7	3	7	7			3.2	5	13	12	10	18	17	13	1	13	9	17
W35	11	10	10	15	6	8	10	8	10	4	1	7			3.3	9	12	13	15		15	21	6	2	10	5
W8	10	9	11	9	8	12	6	12	14	7	4	1			3.4	20	8	7	7	14	12	15	12	4		9
W2	7	9	9	12	4	12	20	30	13	16	5	8			3.6	8	12	10	17	10	14	17	7	8	13	5
W6	9	7	6	8	3	8	11	9	10	7		15			3.8	19	5	7	7	13	15	8	8	14	6	6
W36	10	6	8	4	7	4	9	1	9	6	5	34			4.1	32	3	13	14	15	14	25	4	4	13	7	6
W16	7	8	11	9	7	9	12	10	4	8	9	1			4.3	9	9	11	8	17	12	17	1	4	5		2
W3	10	8	13	13	9	1	4	1	4	4	1	1			4.4	23	12	11	11	13	11	18	3		18		1
W37	7	9	9	17	8	4	9	23	10	5	5	1			4.5	16	7	12	12	9	13	42	10	6	19	9	23
W38	1	1	9	9	6	8	7	8	12	5	1	1			4.6	13	12	20	29	29	9	1	18	12	9	16	20
W39	10	8	15	23	14	7	9	12	17	11	1	1			4.7	17	12							6
W32	7	9	9	21	14	8	12	8	5	14	1	21			5.1	7	5										6
W25	5	4	9	8	12	8	14	8	6	13	9	1			5.2	1	11	13	5	10	5	3	3		5	15	14
W29	5	8	11	14	5	11	11	13	11	14	5	1			5.3	16	8							2			13
W40	25	26	29	32	27	8	1	32	4	4	19	13			5.4	15	7
W41	10	7	7	7	7	8	1	12	7	12	1	10			7.2	9	7	8	12	13	18	4	4		3	5	9
W24	10	10	10	10	9	6	17	8	9	4	1	1			7.3	4	9	13	12	12	10	5	5	1	9	7	11
W20	22	22	19	15	13	16	22	11	7	12	28	20			7.4	1	1	9	8	9	5	5	5		7	9	13
															8.1	4	8	13	14	19	2	2	2	2	10
															9.1	17	17	3	5	1	16	1	10	8
															9.4	15	7	9	9	7	7	2	5		6	10
															9.5	16	13	9	10	13	10	5	5	1		1
															11.1	7	4							1			12
															11.2	13	12	13	16	13	12	4	10		9	17	9
															11.3	19	8	13	10	9	9	4	6	8	17	1	8
															11.4	13	4	5	5	16	6	6	8	2	9		8
															12.2		14	4	6	5	3	4	5	4	7	1	6
															12.3	18	18	10		9	14	1	9	1	5	10
															12.4	9	12	2	11	10	7	4	6	2	8	2
																42
																9.54264		1
																9
																5.50225
																57.6596

## Sheet: Calsium
Dangishta															Robit Bata
Well ID	Jan	Feb	Mar	Apr	May	Jun	Jul	Aug	Sep	Oct	Nov	Dec			Well ID	Jan	Feb	Mar	Apr	May	Jun	Jul	Aug	Sep	Oct	Nov	Dec
W9	8	6	8	10	8	12	12	14	8	8	17	7.8			1.1	12	12	8	8	18	14	14	6	8	14
W4	5	6	8	10	10	8	2	14	6	20					1.2	14	14	12	4	4	10	8	10	10	17
W19	10	10	5	1	8	2	2	1	8	4	10	2			1.3	10	10	10
W5	17	16	18	20	18	24	8	24	4	4	12	8			1.4	14	14
W17	6	2	7	12	4	4	10	6	4	1	8	1			1.6	2	2	8	4	8	8	10	6	4	1
W43	12	12	22	12	16	12	10	12	6	7					2.1	8	8	12	10	6	18	16	14	8	17	4	3
W31	14	12	16	32	20	8	14	20	14	10	9	8			2.2	6	6	12	14	16	18	10	10	12	16
W33	9	8	8	20	16	10	8	8	6	10		16			2.3	18	18	12	12	12	14	10	4	12	20
W13	12	12	12	8	10	4	6	4	2	10					2.4	18	18	32	16	12	12	18	8	10	13
W7	12	12	17	12	14	12	14	26	10	10	12	3			2.5	20	20	6	24	18	20	16	24	8	13
W12	14	12	12	22	28	8	12	8	14	4	12	7.6			2.6	16	16	16	16	20	18	22	24	6	16
W23	15	16	19	12	14	14	20	16	12	8		14			3.1	12	12	12	8	12	12	18	6	10	18
W34	11	12	12	22	26	30	26	18	6	22	14	11			3.2	26	26	16	16	14	8	12	4	5	22
W35	10	10	11	12	12	10	14	10	6	6	12	12			3.3	12	12	12	10		4	48	8	10	14
W8	7	6	6	12	10	10	6	16	10	12	15	4			3.4	12	12	14	10	16	16	28	37		14
W2	8	6	7	6	10	12	8	12	8	8	11	9			3.6	16	16	18	18	14	18	24	4	22	22
W6	5	6	7	8	8	6	18	10	6	4	12	11			3.8	10	10	14	16	16	8	12	6	8	11
W36	15	18	20	8	6	8	8	12	0	4	16	16			4.1	6	6	26	22	18	18	22	10	12	24	19	22
W16	16	14	18	22	18	16	12	10	6	14	4	4			4.3	14	14	14	12	16	20	22	12	7	14	2	9.6
W3	10	12	18	22	20	4	6	6	6	4					4.4	16	16	20	14	16	18	26	4	14	14	9.8	14
W37	14	14	13	24	22	14	8	16	14	12	16	14			4.5	10	10	18	22	18	22	20	18	14	9	20	5
W38	20	22	30	12	16	20	12	16	6	6					4.6	10	10	22	36	36	16	18	6	14	22	12	24
W39	10	12	17	38	16	6	14	18	6	6		44			4.7	14	14									12
W32	16	18	19	22	26	12	16	16	4	8	15	12			5.1	8	8									4	6
W25	10	6	18	20	24	12	20	12	10	12					5.2	12	12	14	8	13	10	10	6	4	10	0	5
W29	14	12	12	30	12	16	8	16	8	12					5.3	12	12									12	14
W40	5	0.2	9	18	22	14	0.01	12	2	14	19	16			5.4	4	4
W41	5	8	8	8	8	10	12	10	8	4		8			7.2	12	12	10	22	22	28	34	2	2	8	2	6
W24	10	10	11	12	22	10	4	8	20	6	6	9			7.3	24	24	16	18	18	16	14	8	8	13	8	8
W20	5	0.35	16	32	24	30	30	9	16	16	25	36			7.4	10	10	4	16	14	18	14	10	12	10	19	14
															8.1	20	20	26	22	30	16	24	8	10	22
															9.1	14	14	6	6	12	32	34	4	4	5
															9.4	12	12	10	8	4	4	8	6	6	12
															9.5	12	12	12	16	22	16	14	12		10
															11.1	6	6									16	8
															11.2	12	12	38	24	26	24	22	8	8	14	10	20
															11.3	16	16	18	16	14	12	12	8	8	14	12	14
															11.4	4	4	10	6	16	4	16	10	14	17	25	6
															12.2	26	26	10	4	8	10	8	8	6	13	12	18
															12.3	8	8	8	16	18	20	20	4	6	9
															12.4	12	12	12	12	10	8	10	8	6	15

## Sheet: Iron
Dangishta														Robit Bata
Well ID	Jan	Feb	Mar	Apr	May	Jun	Jul	Aug	Sep	Oct	Nov	Dec		Well ID	Jan	Feb	Mar	Apr	May	Jun	Jul	Aug	Sep	Oct	Nov	Dec
W9	0.21	0.25	0.25	0.25	0.4	0.05	0.12	0.05	0.15	0.05	0.04	0.25		1.1	0.04	0.1	0.05	0.05	0.05	0.05	0.4	0.15	0.11	0.01
W4	0.31	0.3	0.2	0.1	0.15	0.15	0.13	0.25	0.15	0.25				1.2	0.0733	0.2	0.15	0.05	0.15		0.45	0.2	0.06	0.06
W19	0.031	0.35	0.3	0.25	0.25	0.05	0.03	0.15	0.15	0.05	0.3	0.33		1.3	0.02	0.2	0.2
W5	0.37	0.35	0.33	0.3	0.4	0.05	0.2	0.1	0.3	0.2	0.1	0.3		1.4	0.0367	0.1	0
W17	0.25	0.25	0.28	0.3	0.2	0.05	0.1	0.45	0.3	0.35	0.3	0.45		1.6	0.1	0.1	0.05	0.05	0.05	0.15	0.35	0.25	0.16	0.11
W43	0.4	0.35	0.35	0.2	0.35	0.1	0.3	0.15	0.25	0.15				2.1	0.0333	0.2	0.1	0.2	0.1	0.05	0.3	0.25	0.09	0.02	0.15	0.09
W31	0.32	0.3	0.33	0.35	0.15	0.2	0.04	0.1	0.3	0.31	0.35	0.15		2.2	0	0.3	0.35	0.2	0.25	0.1	0.2	0.05	0.04	0.09
W33	0.042	0.05	0.2	0.35	0.25	0.1	0.1	0.26	0.25	0.2		0.15		2.3	0.36	0.1	0.05	0.15	0.05	0.05	0.3	0.25	0.21	0.06
W13	0.25	0.25	0.23	0.35	0.45	0	0.05	0.1	0.15	0.15				2.4	0.02	0.15	0.1	0.2	0.1	0.05	0.5	0.2	0.19	0.01
W7	0.3	0.3	0.3	0.2	0.25	0.1	0.1	0.05	0.2	0.26	0.3	0.15		2.5	0.0867	0.1	0.16	0.15	0.1	0.05	0.55	0.05	0.06	0.01
W12	0.4	0.3	0.2	0.3	0.1	0.1	0.05	0.2	0.1	0.05	0.25	0.35		2.6	0.03	0.15	0.1	0.05	0.05	0.05	0.3	0.15	0.09	0.21
W23	0.28	0.35	0.28	0.1	0.25	0	0.12	0.2	0.2	0.22		0.05		3.1	0.2733	0.1	0.05	0.1	0.05	0	0.35	0.18	0.16	0.06
W34	0.15	0.15	0.18	0.2	0.05	0.3	0.5	0.2	0.35	0.35	0.25	0.25		3.2	0.0433	0.35	0.1	0	0.05	0.1	0.35	0.29	0.06	0.16
W35	0.3	0.2	0.23	0.2	0.1	0.05	0.15	0.15	0.25	0.21	0	0.35		3.3	0.01	0.15	0.1	0.1	0	0.1	0.4	0.25	0.14	0.06
W8	0.15	0.3	0.38	0.25	0.05	0.1	0.13	0.18	0.15	0.15	0.35	0.25		3.4	0.06	0.2	0	0.25	0.05	0	0.05	0.02	0.04	0.06
W2	0.1	0.1	0.28	0.45	0.2	0.2	0.2	0.2	0.2	0.1	0.15	0.25		3.6	0.01	0.1	0.05	0.15	0.05	0.15	0.4	0.22	0.09	0.08
W6	0.3	0.3	0.3	0.45	0.2	0.35	0.03	0.21	0.15	0.1	0.15	0.3		3.8	0.05	0.03		0.05	0.05	0.1	0.4	0.2	0.24	0.11
W36	0.2	0.1	0.2	0.3	0.35	0	0.02	0	0.2	0.3	0.3	0.3		4.1	0.13	0.1	0.1	0.1	0.1	0.1	0.05	0.1	0.04	0.01	0.01	0.11
W16	0.14	0.25	0.43	0.3	0.02	0.09	0.15	0.05	0.05	0.25	0.15	0.02		4.3	0.07	0.15	0	0.05	0.1	0.1	0.1	0.2	0.09	0.01	0.12	0.16
W3	0.1	0.2	0.25	0.35	0.35	0.45	0.42	0.35	0.25	0.02				4.4	0.02	0.02	0	0.1	0.2	0.05	0.45	0.4	0.29	0.16	0.01	0.06
W37	0.2	0.2	0.23	0.3	0.1	0.2	0.2	0.1	0.2	0.15	0.15	0.15		4.5	0.02	0.1	0.05	0.05	0.15	0.1		0.1	0.06	0.16	0.01	0.16
W38	0.31	0.25	0.25	0.25	0.05	0.1	0.13	0.05	0.25	0.22				4.6	0.0467	0.2	0.25	0.15	0.1	0.1	0.05	0.1	0.11	0.21
W39	0.2	0.2	0.28	0.25	0.15	0.05	0.05	0.07	0.2	0.12		0.6		4.7	0.01	0.25									0.01
W32	0.02	0.03	0.17	0.35	0.6	0.1	0.15	0.15	0.1	0.15	0.1	0.25		5.1	0.0533	0.05										0.01
W25	0.21	0.25	0.28	0.3	0.3	0	0.05	0.2	0.25	0.2				5.2	0.01	0.15	0.1	0.1	0.05	0.1	0.3	0.1	0.09	0.29	0.21	0.01
W29	0.23	0.3	0.25	0.3	0.15	0.05	0.21	0.05	0.15	0.15				5.3	0.07	0
W40	0.13	0.3	0.25	0.2	0.35	0.3	0.25	0.05	0.1	0.08	0	0.15		5.4	0.05	0.15
W41	0.12	0.2	0.18	0.15	0.3	0.15	0.13	0	0.3	0.3		0.25		7.2	0.02	0.2	0.05	0.15	0.1	0.05	0.05	0.15	0.11	0.11	0.06	0.09
W24	0.5	0.5	0.35	0.2	0.2	0	0.25	0	0.25	0.25	0.45	0.45		7.3	0.02	0.05	0	0.1	0.1	0.1	0	0.1	0.14	0.11	0.26	0.11
W20	0.04	0.03	0.09	0.15	0.1	0.2	0.11	0.1	0.1	0.15	0.3	0.05		7.4	0.01	0.01	0.05	0.1	0.05	0.1	0.4	0.03	0.03	0.21	0.11	0.01
														8.1	0.04	0.1	0.1	0.15	0.1	0.05	0.3	0.15	0.04	0.16
														9.1	0.04	0.04	0.05	0.05	0.05	0.05	0.35	0.2	0.11	0.16
														9.4	0.0867	0.25	0.05	0.1	0.05		0.1	0.2	0.11	0.06
														9.5	0.08	0.3		0.2	0.2	0.15	0.4	0.1	0.06	0.01
														11.1	0.02	0.15									0.06	0.11
														11.2	0.04	0.05		0.15	0.15	0.05	0.4	0.4	0.21	0.06	0.26	0.06
														11.3	0.04	0.25	0.01	0	0.05	0.1	0.45	0.03	0.05	0.01	0.36	0.26
														11.4	0.06	0.15	0.05	0.05	0.25		0.25	0.05	0.01	0.01		0.01
														12.2	0.0767	0.25	0.1	0.15	0.15	0.05	0.35	0.1	0.11	0.11
														12.3	0.03	0.03	0.05	0.05	0.1	0	0.25	0.05	0.01	0.08
														12.4	0.01	0.1	0.1	0.1	0.1	0.1	0.8	0.1	0.06	0.06

## Sheet: pH
Dangishta														Robit Bata
Well ID	2017-01-17	2017-02-18	2017-03-22	2017-04-23	2017-05-25	2017-06-26	2017-07-28	2017-08-29	2017-09-30	2017-10-01	2017-11-01	2017-12-03		Well ID	2017-01-17	2017-02-18	2017-03-22	2017-04-23	2017-05-25	2017-06-26	2017-07-28	2017-08-29	2017-09-30	2017-10-30	2017-11-01	2017-12-03
W9	5.81	5.75	5.8	5.8	5.85	5.73	5.88	5.84	6.55	6.4	6.25	5.92		1.1	6.3	6.3	6.4	6.4	6.4	6.4	6.3	6.4	6.7	6.7	6.8	6.8
W4	6.3	6.21	6.3	6.2	6.32	5.88	6.44	5.97	7	6.52	7.41			1.2	6.2	6.2	6.7	6.7	6.7	6.7	6.9	6.5	6.8	6.6	6.9	6.7
W19	6.5	5.94	6.2	5.9	5.95	5.59	5.34	5.31	5.93	5.68	5.84	5.44		1.6	6.4	6.2	6.5	6.5	6.8	6.8	6.7	6.8	7.1	6.8	6.7	6.8
W5	6.19	6.74	6.4	6.7	6.57	6	6.06	6.3	7.6	6.07	6.66	6.08		2.1	5.97	6.28	6.28	6.24	6.24	6.65	6.4	6.32	6.53	6.81	6.79	6.29
W17	5.5	5.35	5.4	5.3	5.5	5.42	5.39	5.8	6.08	5.71	5.74	5.5		2.3	6.2	6.2	6.6	6.6	6.4	6.5	6.4	6.5	6.9	7.1	7.1	6.8
W43	5.94	5.9	6		6.15	5.78	5.8	5.2	6.46	6.25	6.34			2.4	6.1	6.1	6.4	6.4	6.1	6.8	6.8	6.2	6.9	6.7	6.8	6.8
W31	5.94	5.9	6	6	6.15	5.8	5.8	5.2	6.7	6.51	6.17			2.5	6.2	6.2	6.6	6.6	6.9	6.7	6.9	6.4	7.1	7.1	6.8	6.8
W33	6.14	5.9	6.4	6.3	6.6	6.06	6.15	6.4	6.71	6.58	6.44	6.03		2.6	6.2	6.2	6.5	6.5	6.5	6.7	6.8	6.6	6.5	6.9	7	6.7
W13	5.6	6.08	5.8	6	5.99	6.22	5.22	5.6	6.14	5.69	5.7	5.16		3.1	6.25	6.25	6.25	6.25	6.17	6.34	6.3	6.53	6.84	6.77	6.84	6.6
W12	6.5	5.94	6.5	6.2	6.56	5.93	6.17		6.01	5.73	6.14	5.7		3.2	6.3	7.1	6.3	6.3	6.3	6.9	6.3	6.5	6.8	6.7	6.9	6.7
W23	5.97	6.21	6	6.2	6.22	5.94	6.08	5.88	6.7	6.65	7.12	6.06		3.3	6.1	6.1	6.1	6.1	6.1	6.6	6.9	6.6	6.8	6.7	6.8	6.7
W34	7.13	6	6.9	6.3	6.58	6.23	6.34	6.2	7	6.98	6.88	6.82		3.4	6.2	6.2	6.4	6.4	6.4	6.5	6.5	6.3		6.9	7.1	6.7
W35	6.17	6.83	6.1	6.4	6.04	5.8	5.98	5.99				6.12		3.6	6.1	6.1	6.3	6.3	6.7	6.7	6.6	6.2	7	7.4	7.1	6.7
W8	6	5.83	6	5.9	6.05		5.98	5.4	6.55	6.18	6.36	6.04		3.8	6.3	6.3	6.4	6.4	6.4	6.4	6.4	6.2	7	6.6	6.8	6.7
W2	6.45	5.77	6.4	6.4	6.3	5.96	6.03	5.84	6.8	6.89	6.62	6.32		4.1	7.1	5.6	6.5	6.5	6.7	6.6	6.6	6.6	6.8	6.8	6.9	6.7
W6	5.72	6.2	5.8	6.1	5.9	5.83	5.83	5.81	6.57	6.48	6.09	5.91		4.3	6.3	6.5	6.5	6.6	6.6	6.5	6.7	7	6	6.2	6.5
W36	5.74	5.65	5.8	5.7	5.8		5.96	5.15	6.21	6.18	6.04	5.18		4.4	6.5	6.5	7.5	7.5	6.6	6.8	6.9	6	6.7	6.9		6.9
W16	5.9	5.63	6.2	6	5.9	5.85	6.21	5.95	5.82	5.84	5.82	5.58		4.5	6.5	6.5	6.5	6.5	6.6	6.7	6.7	6.7	6.7	7	7	6.8
W3	6.22	5.12	6.3	5.8	6.39	5.97	5.9	6.18	6.4	6.43	6.26	5.84		4.6	6.6	6.6	7.2	7.2	7.1	6.8	7	6.8	7	6.9	7	6.7
W37	6.08	6.57	6.2	6.4	6.25	5.98	6.17	5.43						5.2	6.2	6.2	6.8	6.8	7	7	6.9	6.2	6.8	6.9	7.2	6.4
W38	6.42	6.24	6.3	6.2	6.21	6.14	6.65	6.57	7.2	6.58	6.36	6.31		7.2	6.2	6.2	6.67	6.67	6.7	6.88	7.08	6.28	6.52	6.92	6.97	6.74
W39	7	7.1	7	7	6.91	6	6.2	5.98		6.51	6.77			7.3	6.45	6.45	6.6	6.6	6.53	6.76	6.83	6.62	6.58	6.78	6.8	6.9
W32	6.22	6.24	6.5	6.5	6.82	6.57	6.25	5.96	6.98	6.85	6.74	7.07		7.4	6.2	6.2	6.5	6.5	6.5	6.7	6.7	6.4	6.4	6.5	6.4	6.6
W25	6.4	6.48	6.51	6.6	6.6	6.18		5.73		6.83	6.88	6.23		8.1	6.2	6.2	6.6	6.6	6.6	6.6	6.5	6.8	6.7	7		6.6
W40	6.3	6.45	6.4	6.5	6.45	6.01	6.37	6.11	6.6	6.83	6.76	6.32		9.1	6.5	6.5	6.87	6.87	6.9	7.18	7.33	6.47	6.8	6.98	7.22	6.8
W41	5.84	5.67	5.9	5.8	5.9	5.87	5.94	5.72	6.61	6.41	6.61	5.92		9.4	6	6	5.8	5.8	6.1	5.8	6.1	6.3	6.7	6.5	6.9	6.6
W24	6.43	6.14	6.7	6.5	6.88		6.36	5.92	6.02	6.67	6.94	6.3		9.5	6.1	6.1	6.9	6.9	7.1	7.1	6.8	6.7	7.1	7	7	6.7
W20	5.66	5.6	5.8	5.8	5.86	5.83	5.43	5.78	5.9	5.84	6.31	5.18		11.2	7	7	6.9	6.9	7	7	6.9	6.5	6.6	6.9	7.2	6.6
														11.3	6.1	6.1	6.4	6.4	6.4	7.2	7	6.6	6.7	6.8	6.8	6.8
														11.4	6.5	6.5	7.1	7.1	6.8	6.7	6.5	7.1	6.9	7.1	7.1	6.8
														12.2	6.2	6.2	6.2	6.2	6.6	6.4	6.8	6.4	6.9	6.6	6.6	6.8
														12.3	6.3	6.3	6.4	6.4	6.4	6.6	6.3	5.9	6.6	6.2	6.3	6.8
														12.4	6	6	6.5	6.5	6.4	6.5	6.6	6.1	6.7	6.3	6.4	6.7

## Sheet: EC
Dangishta																										Robit Bata
Well ID	2017-01-17	2017-02-18	2017-03-22	2017-04-23	2017-05-25	2017-06-26	2017-07-28	2017-08-29	2017-09-30	2017-10-01	2017-11-01	2017-12-03	2018-01-04	2018-02-05	2018-03-09	2018-04-10	2018-05-12	2018-06-13	2018-07-15	2018-08-16	2018-09-17	2018-10-19	2018-11-20	2018-12-22		Well ID	2017-01-17	2017-02-18	2017-03-22	2017-04-23	2017-05-25	2017-06-26	2017-07-28	2017-08-29	2017-09-30	2017-10-30	2017-11-01	2017-12-03	2018-01-04	2018-02-05	2018-03-09	2018-04-10	2018-05-12	2018-06-13	2018-07-15	2018-08-16	2018-09-17	2018-10-19	2018-11-20
W9	177.5	188	135.3	140.6	93.1		103.1				116.1	195.1	190.6	187.7	184.7	276.1	175.8	161.5	145.4	158.3	151.7	159.3				1.1			99	99	99	140	134	75				158	89	175	175	326	256	186	103.2	96.7	105.4	124.3	139.6
W4	81	50.5	75.7	60.5	70.4		60				214.9	303.9	239.7	236.6	233.5	197.6	250.3	354.5	107.8	232	60.6	68.9				1.2	216	216	94	94	111	99	97	84				155	160	175	175	325	240	155	102.7	119.9	114.5	91.2	138.8
W19	225	115.9	141.9	87.4	69.6		50.1				77.3	72.1	68.3	89.2	22.6	166	92.8	84.9	94.6	61.5	57.6	60.9				1.6	105	105	79	79	63	82	76	57				89	90	102	102	242	176	110	68.4	66.2	80.8	74.1	94.8
W5	178.4	236	173.2	202	168		166.6				157.8	162.1	162	202.1	242.2	328.2	299	186.7	286.2	215.3	182.5	140				2.1	100.5	122.8	122.8	108.5	108.5	99	111.3	109.7	97.4				150	166	221.5	221.5	125	125	73.2	10.1	135.3	144.4	189.8
W17	74	78.8	60	62.4	51.9		44.3				322.5	214.7	244.3	233	370.8	370.8	152.9	92.5	76.4	76.3	80.1	67.3				2.3			142	142	141	143	112	87				186	191	195	200	281	203	125	157.3	139	134.8	157.3	179.3
W43	180.5	190.1	156.6		132.7		122.2				162.2	174.1	168.4	174.1	179.8	289	188	178.3	167.4	146.2	131	180.2				2.4	230	230	125	125	131	98	156	66				197	192	227	213	367	252	137	199.3	111.7	105.1	156.3	134.9
W31	180.5	190.1	156.6	161.4	132.7		122.2				194.5	178.4	171.3	181.9	192.4	323.2	249.6	193.7	201.5	221.1	305.7	132				2.5	211	211	135	135	141	139	157	76				197	200	212	223	324	258	192	188.7	174.3	137.1	146.7	176.1
W33	157	192.9	144.2	162.2	131.4		91.7				147	141.3	146.3	152	157.7	321.1	240	130.1	163.1	126	113.5	131.8				2.6	225	225	140	140	140	141	151	146				183	183	202	221	297	244	190	201.3	197.4	187	175.8	195
W13	160	174.1	123.7	130.7	80.9		88.6				210.2	263.7	295.9	225.7	155.4	254.8	155.5	236.4	143.4	137	153	180.6				3.1	227	227	129.2	129.2	129.5	134	129.6	83.1				188					184	184	182.2	119.5	127.5	161.9	165.6
W12	157.6	184.7	161.3	174.9	284		79.3				163	221.3	175.8	180.7	185.6	195	363.8	68.1								3.2			145	145	131	136	130	87				195	182	189	197	344	277	209	185.9	133.8	127	146.8	169.8
W23	210	160.2	165.8	140.9	112.1		118.3				196.8	208.7	206.8	202.7	198.6	304.6	200	192.8	172.8	160.4	157.6	211.5				3.3	221	221	128	128	128	125	155	75				188	182	192	203	311	242	173	109	195.6	109.7	141.9	164.7
W34	124.3	212	166.7	210.5	209		114.5				193	166.3	139.1	166.8	166.8	153	340	249.4	166.8	157.2	159.7	153.5				3.4			144	144	102	152	151	66				82	87	142	196	330	269	208	194	138.1	189.4	137.5	185.5
W35	174.6	144.7	134.6	119.6	94.5		91.3				189	191.5	171.9	170.6	170.6	266.3	167.1	148.9	164.1	136.4	141.7	145.8				3.6	216	216	150	151	154	154	151	67				246	87	142	198	347	279	210	194.8	136.6	203.6	139.9	188
W8	181.8	174.1	141	137.1	100.1		107.2				212.6	191.5	191.1			302.1	249.8		145.5	156.7	172.4	173.8				3.8			107	107	139	134	133	68				151	170	176	182	308	308		180.9	92.7	91.1	132.8	98.1
W2	146	201	120.8	148.3	95.6		108.7				102.2	171.4	168.9	159.9	150.9	235.1	138	142.2	215.4	163.9	173.1	162.9				4.1	140	140	185	185	175	166	158	75				245	246	275	275	402	256	109	154.1	158.2	115.3	169.4	191.9
W6	154.3	138.1	118.4	110.3	82.4		89				180.4	173.6	166.8	162.2	151.4	204	151.7	186.3	140.7	135.2	134.1	151				4.3	133	230	230	132	132	148	150	152					123	151	196	196	205	214	184.4	82.8	105.1	81.9	136.8
W36	137.7	160	104.6	115.8	71.5		76.5				141.4	138.2	173.3	162.4	151.4	168.3			126.5	121.5	125.6	122.5				4.4	221	221	145	146	157	160	153	43				184	187	223	223	386	321	256	150.3	165	201.1	200.5	203.5
W16	191.6	141.2	168.8	143.6	139		116.6				171.8	159.3	156.4	177.1	197.7	223.8	239.1	213.8	220.3	164.1	172.6	159.9				4.5			170	170	162	168	158	123				218		227	227	367	300	232	218.3	212.4	196.5	216.1	221.5
W3	355	223	255	189	155		47.4				102.2	125.2	129.9	139.2	139.2	331.6	234.8	215.3	186.4	79.9	94.3	79.6				4.6	232	232	201	201	276	136	145	85				183	187	196	206	455	305	154	128.9	141.3	138.6	178.5	185
W37	175.4	255	140.5	180.3	105.5		98.4				168.4	165.9	159	169.4	169.4	209.45		172.5	159.4	143.4	157.7	132.9				5.2			83	83	97	97	95	68				169	94	178	178	194	150	107	180.9	90.5	83.7	88.4	139.1
W38	195	203	159.7	163.7	124.3		111.1				212.6	198.5	165.2	196.4	196.4	301	204.3	192.3	76	162.3	168.3	171.7				7.2	217	217	153	153	160.2	165	164	52.8				183.2					228	228	130.1	71.2	76.7	67.4	70.5
W39		315	100.5	258	201		103.9				133.2	127.2	196.4	148.4	100.3	322.6	365.6	245.7	179.4	160.6	179.5	117.9				7.3	266	266	133.9	133.9	144	139.8	132	44.4				184.3					197	197	182.5	128.5	100.3	117.2	134.3
W32	204	208	192.5	194.5	181		93.8				195.8	168.8	171.3	181.8	192.3	424.5	297	259	152.3	133.9	140.3	139.4				7.4			160	160	137	144	133	90				199	188	199	211	347	274	201	148.9	128	120.7	120.6	131.5
W25	1375	218	233	179	186.5	131.7		133.9				216	226.1	235.1	204.6	204.6	240.8	201.5	201.2	187	127.6	155.5				8.1	269	269	189	189	201	196	191	82				166	222	238	238	328	297	266	155.2	160	89.8	169.3	209.6
W40	355	393	296	315	237		206				361.5	335	346.2	350.4	354.6	272.75	364.3	328.2	329.5	268	259.2	272				9.1	105.8	105.8	71.8	71.8	152.6	271	236	48.1				154					182	182	100.3	77.8		138.1	164.2
W41	151.6	157.1	121.3	124.1	91.6		90.7				166	155.8	144.3	249.5	354.6	264.5	156.9	146.2	177.1	130.6	132.1	128.8				9.4	190	190	83	83	85	82	83	56				116	189	125	146	237	182	128	96.3	112.5	92.3	99.4	106.6
W24	152.9	209	182	210	211		101.5				140.8	134.6	139.2	149.6	159.9	282			152.7	107.7	141.1	100.5				9.5	218	218	131	131	157	140	138	99				157	125	150	175	234	234
W20	647	467	438	348	221		232				112.9	366.3	396.1	282.9	169.6	466.6	339	318.1	309	292.1	241.4	240.4				11.2	225	225	185	185	190	196	183	79				187	243	262	281	420	331	241	123.3	129.5	131.4	178.8	216.3
																										11.3	211	211	125	125	132	131	118	68				184	179	187	194	264	234	203	140	128	126.4	153.1	168.4
																										11.4	94	94	120	120	138	87	89	101				136	133	141	149	273	251	228	152.4	133.3	142.9	149.1	139.2
																										12.2	145	145	84	84	87	84	82	56				78	103	129	154	245	183	121	106	85.7	94.4	109	139.9
																										12.3	209	209	127	127	157	186	139	76				140	149	138	127	344	236	128	150.3	91.5	114.2	105.5	124.7
																										12.4	217	217	114	114	134	134	121	74				136	119	127	135	236	187	138	110.3	104.3	110.7	103	120.6
[truncated: 1 more columns]
